# Supplementary material
Source: PubMed Central journal article supplement (PMC5082746)
Supplement: NIHMS819549-supplement-Supplemental_information.pdf [file NIHMS819549-supplement-Supplemental_information.pdf]

**In Vitro Skin Diffusion Study of Pure Forskolin Versus a Forskolin-  
Containing Plectranthus Barbatus Root Extract**

Jing Chen,<sup>†</sup> Dana C. Hammell,<sup>†</sup> Malinda Spry,<sup>‡</sup> John A. D'Orazio,<sup>‡</sup>

Audra L. Stinchcomb\*,<sup>†</sup>

*Department of Pharmaceutical Sciences, College of Pharmacy, University of Kentucky*

*Lexington, KY 40536, and Markey Cancer Center and the Graduate Center for*

*Toxicology, Department of Pediatrics, College of Medicine, University of Kentucky*

*Lexington, Kentucky 40536*

\* To whom correspondence should be addressed. Tel: 859-323-6192. Fax: 859-257-2787.  
E-mail: astin2@email.uky.edu.

<sup>†</sup> College of Pharmacy, University of Kentucky.

<sup>‡</sup> College of Medicine, University of Kentucky.

**S1.** Certificate of analysis of *Plectranthus barbatus* extract.

ATZ NATURAL  
PO Box 458  
Edgewater, N.J. 07020  
Tel 201-869-5600 Fax# 201-869-5655  
[may3@erols.com](mailto:may3@erols.com)  
[www.atznatural.com](http://www.atznatural.com)

**CERTIFICATE OF ANALYSIS**  
**Coleus Forskohii extract 20%**  
**Lot #C40360**

|                                    |                            |                                                                          |
|------------------------------------|----------------------------|--------------------------------------------------------------------------|
| <b>Description:</b>                |                            | <b>Brown powder with characteristic odor</b>                             |
| <b>Identification:</b>             |                            | <b>By HPLC: Complies</b>                                                 |
| <b>Loss on drying:</b>             | <b>3.8%</b>                | <b>(Limit: Not more than 5.0%)</b>                                       |
| <b>Solubility:</b>                 |                            |                                                                          |
| -water solubles                    | <b>12.9%</b>               | <b>(Limit: Not less than 10%)</b>                                        |
| -alcohol solubles                  | <b>45.41%</b>              | <b>(Limit: Not less than 40.0%)</b>                                      |
| <b>Ash Content:</b>                | <b>18.88%</b>              | <b>(Limit: Not more than 30.0%)</b>                                      |
| <b>Heavy Metals:</b>               | <b>10.0 ppm</b>            | <b>(Limit: Not more than 20ppm)</b>                                      |
| <b>Arsenic:</b>                    | <b>0.6 ppm</b>             | <b>(Limit: Not more than 1ppm)</b>                                       |
| <b>Lead:</b>                       | <b>1.2 ppm</b>             | <b>(Limit: Not more than 10ppm)</b>                                      |
| <b>Tapped bulk density:</b>        | <b>0.71 g/ml</b>           | <b>60-80 Mesh(Limit: Not more than 0.50g/ml and 0.90g/ml)</b>            |
| <b>Loose bulk density:</b>         | <b>0.56 g/ml</b>           | <b>(Limit: Between 0.30g/ml and 0.80g/ml)</b>                            |
| <b>Sieve Test: Passes through)</b> |                            |                                                                          |
| -20 mesh                           | <b>100%</b>                | <b>(Limit: Not less than 100%)</b>                                       |
| -40 mesh                           | <b>95.3%</b>               | <b>(Limit: Not less than 75.00%)</b>                                     |
| -80 mesh                           | <b>76.47%</b>              | <b>(Limit: Not less than 50%)</b>                                        |
| <b>Assay:</b>                      |                            |                                                                          |
| -Content of Forskohlin by HPLC     | <b>20.56%</b>              | <b>(Limit: Not less than 20% and not more than 22.0% on dried basis)</b> |
| <b>Microbiological Profile:</b>    |                            |                                                                          |
| <b>Total Microbial Count</b>       | <b>Less than 100 cfu/g</b> |                                                                          |
| <b>Mold and Yeast</b>              | <b>Less than 10 cfu/g</b>  |                                                                          |
| <b>E.Coli</b>                      | <b>Absent</b>              |                                                                          |
| <b>Salmonella</b>                  | <b>Absent</b>              |                                                                          |
| <b>Staphylococcus aureus</b>       | <b>Absent</b>              |                                                                          |
| <b>Pseudomonas aeruginosa</b>      | <b>Absent</b>              |                                                                          |
| <b>Coliforms</b>                   | <b>&lt;=3/g</b>            |                                                                          |
| <b>Country of Origin:</b>          | <b>India</b>               |                                                                          |

**Manufacturing Date: February 2004**

**Expiration Date: January 2009**

This Certificate of Analysis has been created and approved electronically in lieu of actual signature.  
Disclaimer:

The data provided here has been generated to the best of our knowledge and provided as a guide for your consideration & verification

**S2.** Chromatograms of (a) pure **1** in CH<sub>3</sub>CN (10 mg/mL, 20 mL injection) and (b) *P. barbatus* extract in CH<sub>3</sub>CN (10 mg/mL, 20 mL injection) scanned with UV wavelength 200-300 nm with a photodiode array detector.

**(a) Pure forskolin in CH<sub>3</sub>CN (10 μg/mL)**

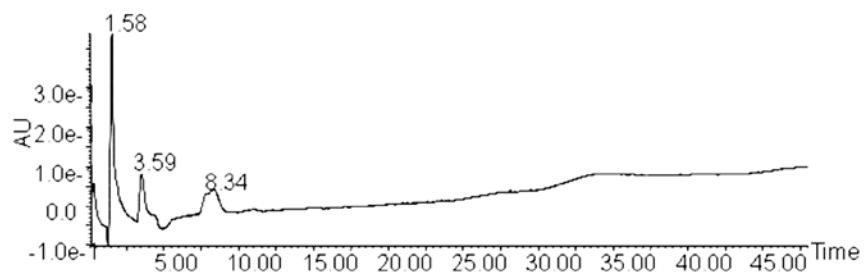

**(b) *P. barbatus* extract in CH<sub>3</sub>CN (10 μg/mL)**

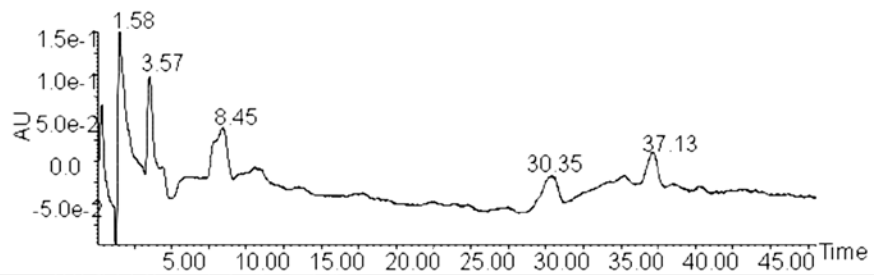

**Figure S2.**
